# Supplementary material for: Single Cell Sequencing of Human Langerhans Cells Identifies Altered Gene Expression Profiles in Patients with Atopic Dermatitis
Source: bioRxiv or medRxiv preprint supplement (doi:10.1101/2024.05.06.24306801), 2024-05-09
Supplement: Supplementary file [file media-1.pdf]

## Supporting Data

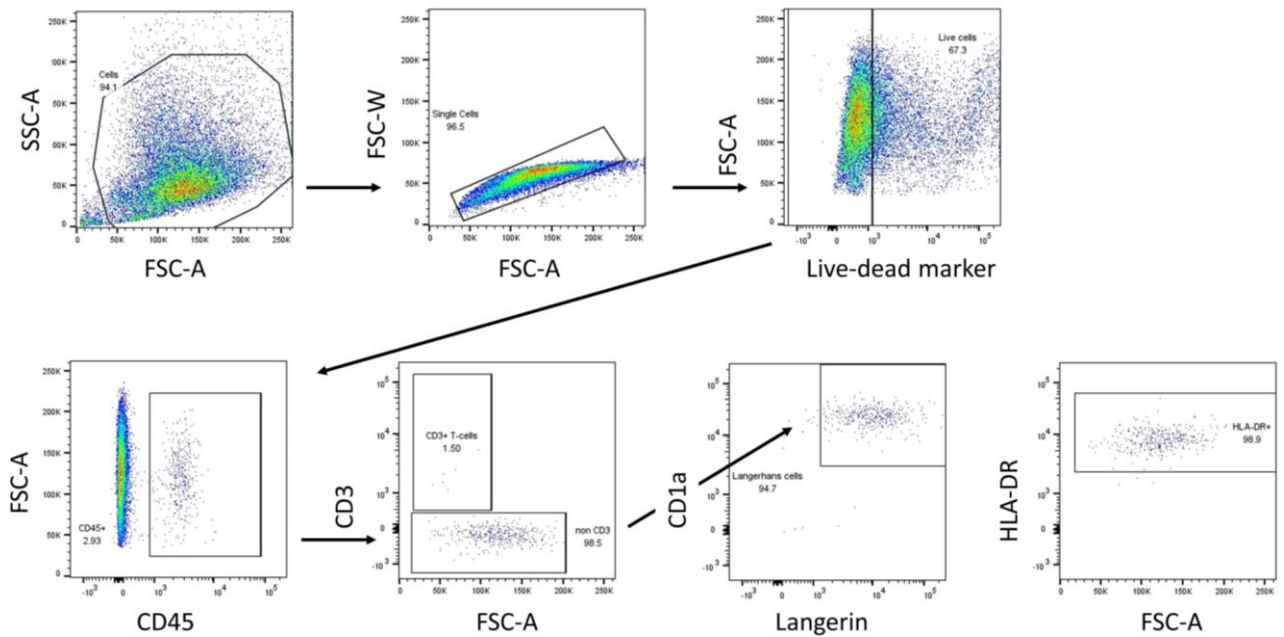

**Figure S1 Gating strategy for sorting LCs from skin epidermis**

Scatter plots showing the gating strategy used for fluorescence-activated cell sorting (FACS), for single Langerhans cells from human epidermis as live, CD45<sup>+</sup>CD207<sup>+</sup>CD1a<sup>+</sup> cells. Plots were extracted from Flow Jo (version 10.9.0).

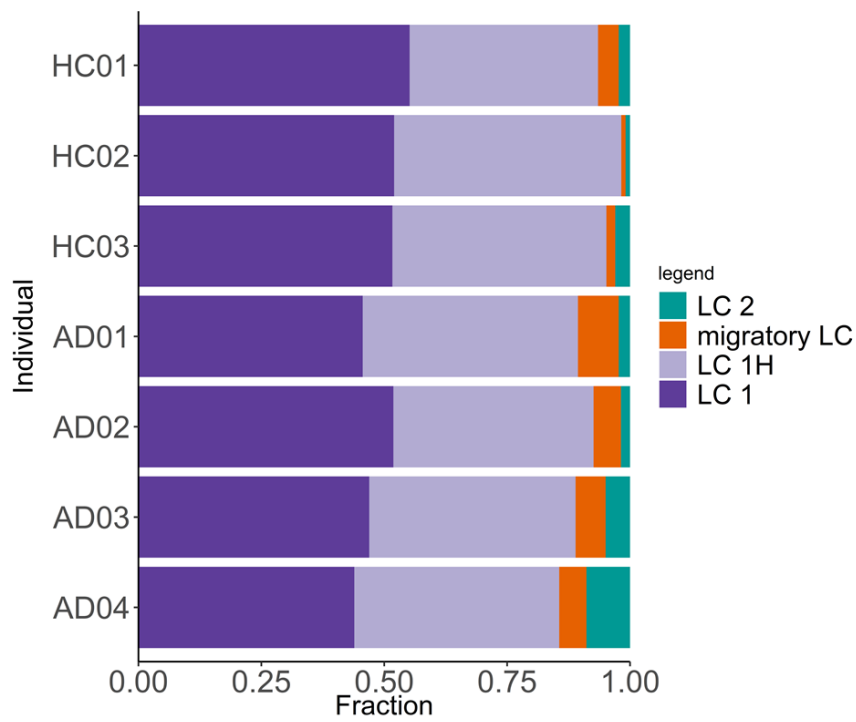

**Figure S2 Abundance LC clusters per individual**

Proportions of LC subsets present in each individual AD patient and HC, detected through single-cell RNA sequencing.

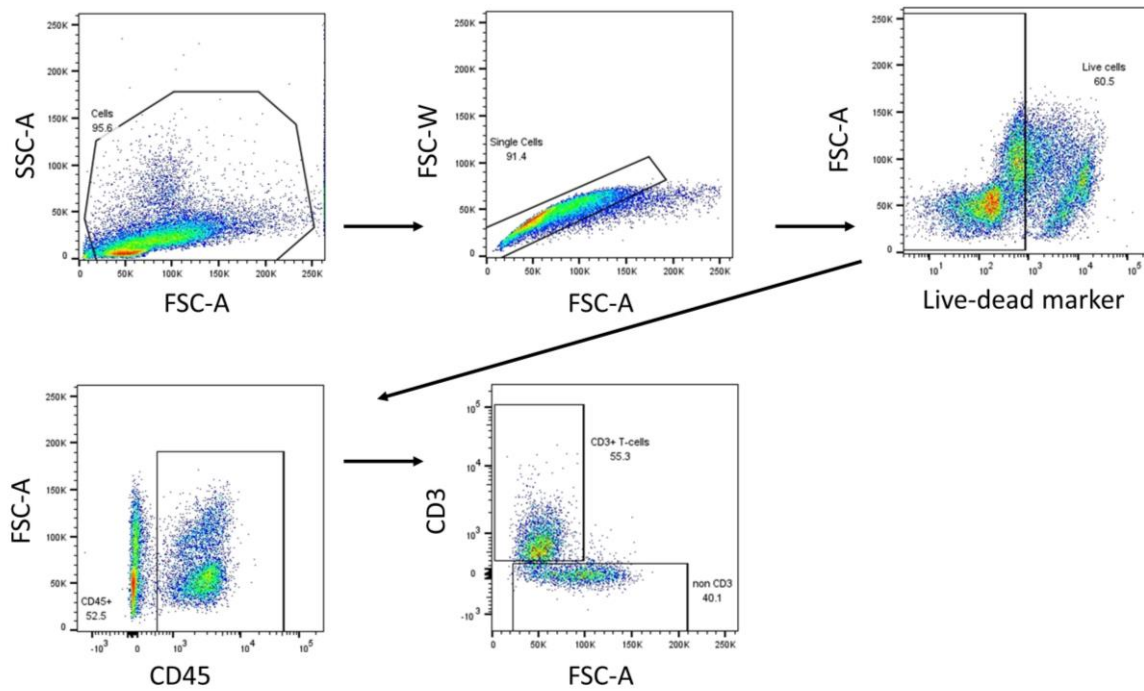

**Figure S3 Gating strategy for sorting CD3+ T cells from the dermis**

Scatter plots showing the gating strategy used for fluorescence-activated cell sorting (FACS), for single T cells from human dermis as live, CD45<sup>+</sup>CD3<sup>+</sup> cells. Plots were extracted from Flow Jo (version 10.9.0).

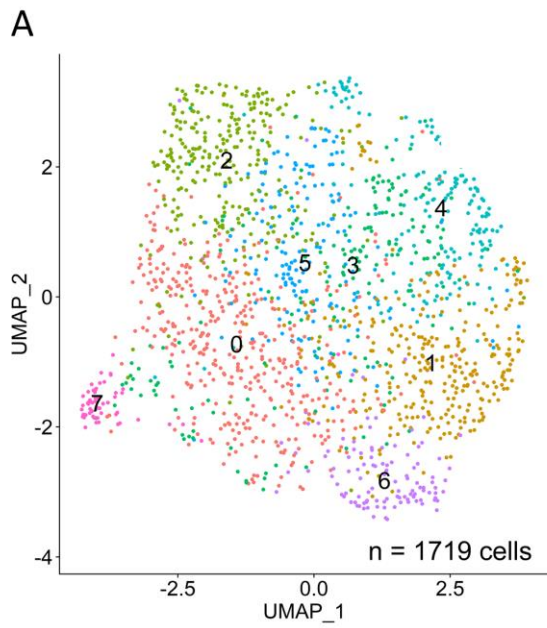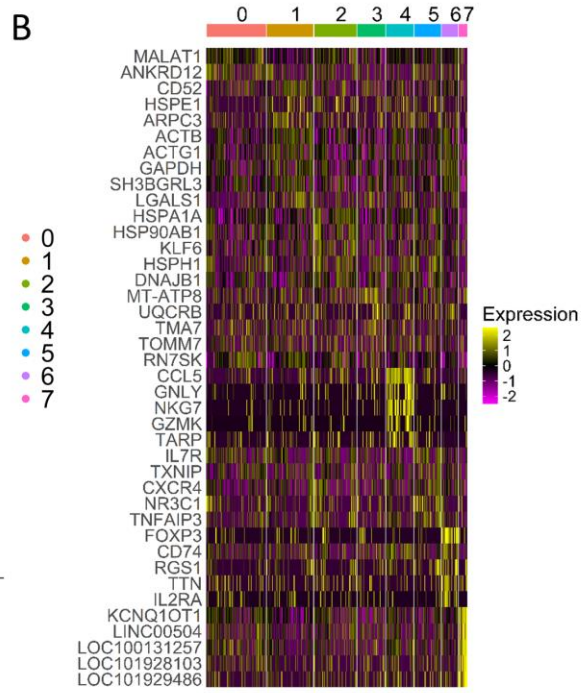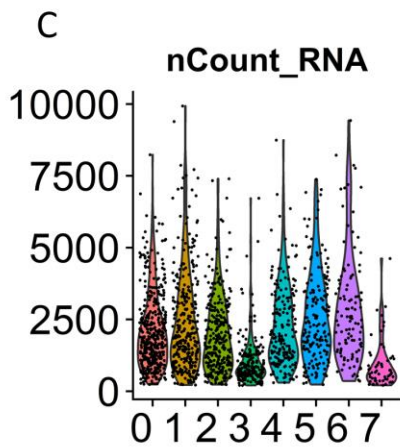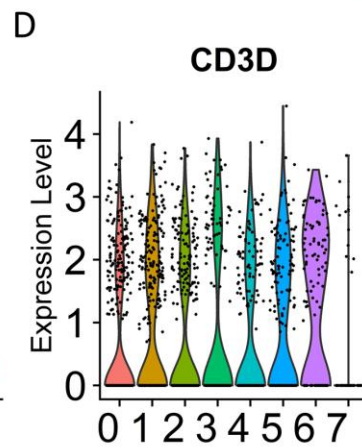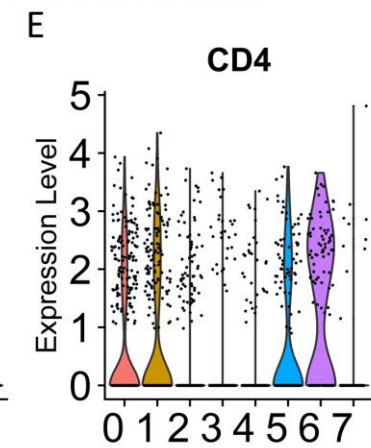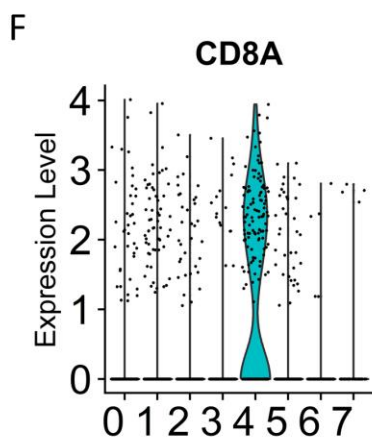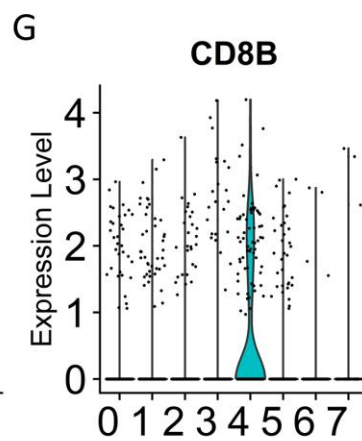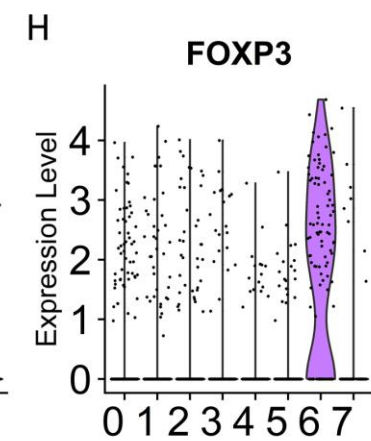

**Figure S4 Initial T cell clustering**

(A) UMAP plot of 1,719 individual CD3<sup>+</sup> T cells from healthy and AD dermis, colored by cluster. (B) Heatmap of top 5 upregulated DEGs per cluster. (C) Volcano plot indicating total RNA molecules (nCount\_RNA) per cell stratified per cluster. (D) Expression of CD3D gene per cell indicated by cluster (E)-(H) same as in (D) but for CD4 , CD8A, CD8B and FOXP3, respectively.

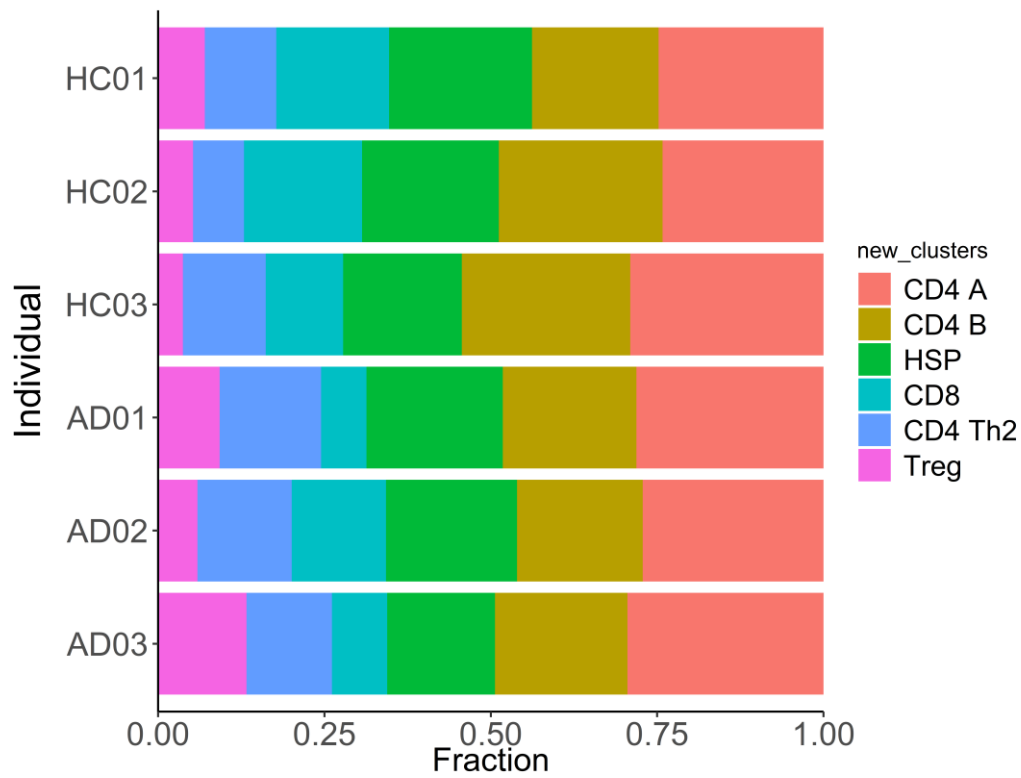

**Figure S5 Abundance T cell clusters per individual**

Proportions of T cell subsets present in each individual AD patient and HC, detected through single-cell RNA sequencing.

**Table S1. Isolated cell numbers per individual after quality control**

| <b>Individual</b> | <b>Langerhans cells</b> | <b>T cells</b> |
|-------------------|-------------------------|----------------|
| AD01              | 217                     | 249            |
| AD02              | 108                     | 254            |
| AD03              | 262                     | 241            |
| AD04              | 271                     | NA             |
| HC02              | 261                     | 242            |
| HC03              | 225                     | 248            |
| HC04              | 333                     | 241            |
|                   | <b>1,677</b>            | <b>1,475</b>   |

**Table S5 Curated genesets used in LC analysis**

| <b>Geneset</b>                                    | <b>Genes</b>                                                                                                                                     | <b>References</b>                                                                     |
|---------------------------------------------------|--------------------------------------------------------------------------------------------------------------------------------------------------|---------------------------------------------------------------------------------------|
| FcεR signaling                                    | FCER1A, FCER1G, ALOX5AP,<br>ALOX5, BTK, JUN, FOS, CBL,<br>CBLB, HCLS1, LCP2, NFATC2,<br>PDHB, PLCB2, PLCB3, PLCG1,<br>PLCG2, PLD2, PTPN6, PTPN11 | BioCarta; FC epsilon<br>receptor signaling<br>FCER1A harmonizome 3.0<br>Kegg HSA04664 |
| Prostaglandin and<br>leukotrienes<br>biosynthesis | PLA2G4A, PTGS2, AKR1C3, PTGIS,<br>TBXAS1, PTGDR2, PTGER3,<br>PTGIR, ALOX5, ALOX5AP,<br>ALOX15, NOP9, CYSLTR1, ABCC4,<br>ANXA2, S100A10, S100A6   | Honda and kabashima 2019<br>WP98 wikipathways                                         |
| C-type lectin<br>receptors and<br>signaling       | CLEC10A, CLEC7A, CD207, MRC1,<br>CD209, LY75, CLEC1A, CLEC4A,<br>PYCARD, JUN, SYK, CALM1,<br>PTGS2                                               | Figdor 2002<br>Liu 2021<br>Kegg c-type lectin signaling<br>HSA04625                   |



**Table S8 Primers used for detection of *tar*-glycosyltransferases**

| <i>tar</i> gene | Forward primer          | Reverse primer           |
|-----------------|-------------------------|--------------------------|
| <i>tarS</i>     | GTGAACATATGAGTAGTGCGTA  | CATAATGTCCTTCGCCAATCAT   |
| <i>tarM</i>     | GGGATACCCATATATTTCAAGG  | CAATTCGCTTCGTTGGTACCATTG |
| <i>tarP</i>     | GTAAGTGTTATAATGCCAACATT | TATCAGCTTTCGCTACATTTC    |

**Table S9 Fluorescent dyes and antibodies used for cell sorting**

| <b>Target</b> | <b>Clone</b>          | <b>Fluorochrome</b> | <b>Manufacturer</b>     |
|---------------|-----------------------|---------------------|-------------------------|
| Viability     | Fixable Viability Dye | eFluor 506          | Invitrogen (65-2860-40) |
| CD45          | HI130                 | BV711               | BioLegend               |
| CD1a          | HI149                 | APC                 | Becton Dickinson        |
| HLA-DR        | G46-6                 | BV605               | Becton Dickinson        |
| CD207         | DCGM4                 | PE                  | Beckman Coulter         |
| CD8           | SK1                   | PE-Cy7              | Sony Biotechnology      |
| CD3           | UCHT1                 | AF700               | BioLegend               |
| CD4           | RPA-T4                | APC-Cy7             | BioLegend               |
